# Supplementary material
Source: PubMed Central journal article supplement (PMC5335587)
Supplement: 10.1194_M074260_jlr.M074260-1.pdf [file 10.1194_M074260_jlr.M074260-1.pdf]

**SUPPLEMENTAL INFORMATION:**

**Unbound Free Fatty Acid Profiles in Human Plasma and the Unexpected Absence of  
Unbound Palmitoleate.**

**Andrew H Huber and Alan M Kleinfeld**

Membrane Sciences, San Diego CA 92121

**Supplemental Table S1: Calibration parameters for the probes of Table2 and the 9 FFAu of Table**

1. KQ, in nM, is the product of the probe FFAu binding constant (Kd) and Q as defined in equation 1.

| Probe<br>ID         | MA    |                  |      | PA               |      | POA              |      | SA               |      | OA               |      |
|---------------------|-------|------------------|------|------------------|------|------------------|------|------------------|------|------------------|------|
|                     | Ro    | K <sub>d</sub> Q | Rm   |
| <b>L2P22G6</b>      | 0.221 | 44.8             | 1.57 | 25.4             | 1.79 | 112              | 1.47 | 35.5             | 0.89 | 62.9             | 1.25 |
| <b>L2P22G6K27C</b>  | 0.217 | 177.1            | 2.88 | 31.4             | 1.15 | 93.2             | 1.10 | 9.0              | 0.50 | 14.3             | 0.44 |
| <b>L4BP4B9</b>      | 0.234 | 43.6             | 6.12 | 28.9             | 4.03 | 205              | 6.93 | 52.7             | 1.27 | 229              | 4.23 |
| <b>L10P7A4-L30C</b> | 0.259 | 13.8             | 0.22 | 4.5              | 0.30 | 13.6             | 0.73 | 5.0              | 0.53 | 5.4              | 1.34 |
| <b>L11P7B3-V26C</b> | 0.193 | 123              | 2.45 | 18.7             | 4.11 | 105              | 3.29 | 3.6              | 4.53 | 12.2             | 4.72 |
| <b>L13EP16E11</b>   | 0.141 | 303              | 0.30 | 51.7             | 0.45 | 66.2             | 0.46 | 16.1             | 0.49 | 7.46             | 0.60 |
| <b>L19CP10C7</b>    | 0.406 | 869              | 0.81 | 44.7             | 1.82 | 52.9             | 1.76 | 11.0             | 2.05 | 8.64             | 2.14 |
| <b>L36P15B7</b>     | 0.116 | 12671            | 4.62 | 46.5             | 0.24 | 56.8             | 0.51 | 15.1             | 0.31 | 8.77             | 0.63 |
| <b>L50BP4E2</b>     | 0.082 | 113.5            | 4.64 | 134              | 5.70 | 639              | 4.59 | 65.4             | 0.59 | 851              | 3.21 |
| <b>L50BP9D5</b>     | 0.356 | 23.2             | 5.03 | 21.1             | 4.70 | 21               | 5.21 | 132.             | 3.62 | 87.1             | 5.54 |
| <b>L50AP31A2</b>    | 0.142 | 18.6             | 1.12 | 49.0             | 0.90 | 289              | 1.78 | 128.             | 0.43 | 2093             | 3.88 |
| <b>L61P8B12</b>     | 0.053 | 430.2            | 4.72 | 54.0             | 8.26 | 37.8             | 9.59 | 40.7             | 2.71 | 37.8             | 8.27 |
| <b>L71BP33D1</b>    | 0.105 | 1642.7           | 0.35 | 44.2             | 0.21 | 69.5             | 0.39 | 2.1              | 0.41 | 10.2             | 0.57 |
| <b>L76P9E4</b>      | 0.028 | 63.9             | 0.05 | 6.7              | 0.09 | 37.3             | 0.31 | 4.0              | 0.28 | 5.21             | 0.75 |
| <b>L106P3B10</b>    | 0.453 | 26.9             | 2.78 | 64.4             | 1.39 | 267              | 2.43 | 50.5             | 0.67 | 92.8             | 1.10 |
| <b>L118P4H5</b>     | 0.081 | 1879             | 0.44 | 194              | 0.36 | 972              | 0.49 | 77.1             | 0.20 | 280              | 0.92 |
| <b>L119P3E5</b>     | 0.230 | 70.6             | 2.43 | 32.5             | 3.50 | 115              | 2.13 | 29.6             | 1.44 | 58.4             | 2.05 |
| <b>L127P3G2</b>     | 0.096 | 1494             | 0.13 | 235              | 0.16 | 687              | 0.17 | 174.4            | 0.33 | 109              | 0.40 |
| <b>L138P1H8N24C</b> | 0.567 | 247.1            | 4.83 | 53.5             | 4.91 | 492              | 5.52 | 39.6             | 3.14 | 27.9             | 4.81 |
| <b>L156P3F926C</b>  | 0.067 | 80.3             | 1.64 | 5.9              | 1.02 | 2.5              | 3.45 | 4.8              | 1.91 | 2.83             | 2.79 |

Supplemental Table S1:continued

| Probe<br>ID  | LA    |                  |       | LNA              |      | AA               |      | DHA              |       |
|--------------|-------|------------------|-------|------------------|------|------------------|------|------------------|-------|
|              | Ro    | K <sub>d</sub> Q | Rm    | K <sub>d</sub> Q | Rm   | K <sub>d</sub> Q | Rm   | K <sub>d</sub> Q | Rm    |
| L2P22G6      | 0.221 | 143              | 1.43  | 307              | 1.53 | 526              | 1.46 | 730              | 1.06  |
| L2P22G6K27C  | 0.217 | 76               | 0.85  | 146              | 1.05 | 64               | 0.59 | 81               | 0.45  |
| L4BP4B9      | 0.234 | 1064             | 10.44 | 1156             | 8.48 | 950              | 4.60 | 429              | 3.95  |
| L10P7A4-L30C | 0.259 | 8                | 1.94  | 20               | 1.67 | 12               | 2.98 | 18               | 3.96  |
| L11P7B3-V26C | 0.193 | 67               | 4.68  | 145              | 3.48 | 65               | 4.81 | 73               | 4.35  |
| L13EP16E11   | 0.141 | 29               | 0.60  | 138              | 0.68 | 18               | 0.53 | 34               | 0.50  |
| L19CP10C7    | 0.406 | 8                | 2.75  | 13               | 2.20 | 31               | 2.28 | 36               | 1.75  |
| L36P15B7     | 0.116 | 27               | 1.25  | 83               | 1.26 | 7                | 2.65 | 3                | 3.36  |
| L50BP4E2     | 0.082 | 989              | 3.84  | 2103             | 4.72 | 3307             | 3.78 | 18055            | 3.88  |
| L50BP9D5     | 0.356 | 80               | 5.94  | 177              | 5.88 | 227              | 5.09 | 891              | 4.09  |
| L50AP31A2    | 0.142 | 9070             | 10.20 | 698              | 0.92 | 939              | 0.85 | 56003            | 10.20 |
| L61P8B12     | 0.053 | 144              | 7.07  | 344              | 8.24 | 239              | 2.60 | 328              | 1.51  |
| L71BP33D1    | 0.105 | 14               | 0.58  | 48               | 0.53 | 2                | 0.78 | 3                | 0.79  |
| L76P9E4      | 0.028 | 19               | 0.78  | 73               | 0.50 | 26               | 0.66 | 31               | 0.80  |
| L106P3B10    | 0.453 | 190              | 1.35  | 385              | 1.67 | 194              | 0.96 | 270              | 0.99  |
| L118P4H5     | 0.081 | 731              | 1.16  | 1725             | 1.22 | 622              | 2.06 | 238              | 3.72  |
| L119P3E5     | 0.230 | 192              | 3.27  | 370              | 3.22 | 340              | 2.33 | 558              | 1.49  |
| L127P3G2     | 0.096 | 312              | 0.71  | 861              | 0.54 | 11               | 1.14 | 39               | 1.00  |
| L138P1H8N24C | 0.567 | 44               | 3.74  | 16               | 5.03 | 177              | 2.37 | 216              | 3.99  |
| L156P3F926C  | 0.067 | 17               | 3.80  | 38               | 3.83 | 39               | 2.10 | 151              | 4.11  |

**Supplemental Table S2: Average R values and CVs for NIST plasma measured at 15, 30, 45 and 60 minutes.** These are the averages of the R values used to obtain the FFAu profiles in Table 6. The

|                      | <b>R</b> | <b>SD</b> | <b>CV</b>    |
|----------------------|----------|-----------|--------------|
| <b>L2P22</b>         | 0.2321   | 0.0006    | 0.26%        |
| <b>L4BP4B9</b>       | 0.2687   | 0.0021    | 0.77%        |
| <b>L10P7A4 30C</b>   | 0.3094   | 0.0008    | 0.26%        |
| <b>L11P7B3 26C</b>   | 0.3022   | 0.0029    | 0.95%        |
| <b>L19CP10C7</b>     | 0.4681   | 0.0012    | 0.26%        |
| <b>L36P15B7-1</b>    | 0.1546   | 0.0007    | 0.42%        |
| <b>L50AP31A2</b>     | 0.1520   | 0.0004    | 0.24%        |
| <b>L50BP4E2</b>      | 0.0911   | 0.0002    | 0.26%        |
| <b>L50BP9D5</b>      | 0.4187   | 0.0006    | 0.13%        |
| <b>L61P8B12</b>      | 0.1287   | 0.0015    | 1.17%        |
| <b>L71BP33D1</b>     | 0.1315   | 0.0002    | 0.19%        |
| <b>L76P9E4</b>       | 0.0589   | 0.0007    | 1.12%        |
| <b>L106P3B10</b>     | 0.4641   | 0.0015    | 0.31%        |
| <b>L119P3E5</b>      | 0.2513   | 0.0011    | 0.44%        |
| <b>L127P3G2</b>      | 0.1002   | 0.0003    | 0.34%        |
| <b>L138P1H8 N24C</b> | 0.5884   | 0.0025    | 0.43%        |
| <b>L156P3F9 26C</b>  | 0.4821   | 0.0039    | 0.80%        |
| <b>L118P4H5</b>      | 0.0810   | 0.0002    | 0.27%        |
| <b>L13EP16E11</b>    | 0.1479   | 0.0002    | 0.13%        |
| <b>L2P22 K27C</b>    | 0.2354   | 0.0005    | 0.21%        |
| <b>Average CV</b>    |          |           | <b>0.45%</b> |

average CV for all the probes and measurements is 0.45%, well within the Table 8 predicted CV needed to obtain reliable FFAu profiles for samples with total FFAu >1.5 nM.

**Supplemental Table S3: Response profiles for each of the 20 probes of table 2.** The probe response profiles were calculated using equation (3) for each probe and with the 9 FFAu set to 1 nM. For most of the probes there is generally one FFAu for which the response is largest and such a probe is considered specific for that FFAu because it may provide a substantial constraint on that FFAu's concentration derived from the fitting algorithm (equations (4)).

|     | <b>L2P22G6</b>    | <b>L2P22G6K27C</b> | <b>L4BP4B9</b>  | <b>L10P7A4-L30C</b> | <b>L11P7B3-V26C</b> |
|-----|-------------------|--------------------|-----------------|---------------------|---------------------|
| MA  | 0.133             | 0.069              | 0.563           | -0.011              | 0.094               |
| PA  | 0.270             | 0.133              | 0.541           | 0.026               | 1.030               |
| POA | 0.050             | 0.043              | 0.139           | 0.125               | 0.152               |
| SA  | 0.083             | 0.131              | 0.082           | 0.175               | 4.873               |
| OA  | 0.073             | 0.066              | 0.074           | 0.654               | 1.779               |
| LA  | 0.038             | 0.038              | 0.041           | 0.706               | 0.342               |
| LNA | 0.019             | 0.026              | 0.030           | 0.256               | 0.117               |
| AA  | 0.011             | 0.026              | 0.020           | 0.784               | 0.361               |
| DHA | 0.005             | 0.013              | 0.037           | 0.746               | 0.292               |
|     | <b>L13EP16E11</b> | <b>L19CP10C7</b>   | <b>L36P15B7</b> | <b>L50BP4E2</b>     | <b>L50BP9D5</b>     |
| MA  | 0.004             | 0.001              | 0.003           | 0.484               | 0.543               |
| PA  | 0.042             | 0.076              | 0.023           | 0.504               | 0.550               |
| POA | 0.033             | 0.062              | 0.059           | 0.085               | 0.621               |
| SA  | 0.146             | 0.337              | 0.106           | 0.093               | 0.069               |
| OA  | 0.389             | 0.442              | 0.454           | 0.045               | 0.165               |
| LA  | 0.107             | 0.619              | 0.345           | 0.046               | 0.195               |
| LNA | 0.028             | 0.312              | 0.117           | 0.027               | 0.087               |
| AA  | 0.142             | 0.145              | 2.782           | 0.014               | 0.058               |
| DHA | 0.072             | 0.089              | 7.810           | 0.003               | 0.012               |

Supplemental Table S3 continued

|     | <b>L50AP31A2</b> | <b>L61P8B12</b> | <b>L71BP33D1</b> | <b>L76P9E4</b>      | <b>L106P3B10</b>   |
|-----|------------------|-----------------|------------------|---------------------|--------------------|
| MA  | 0.349            | 0.205           | 0.001            | 0.013               | 0.184              |
| PA  | 0.091            | 2.828           | 0.021            | 0.272               | 0.032              |
| POA | 0.040            | 4.667           | 0.039            | 0.270               | 0.016              |
| SA  | 0.016            | 1.211           | 0.223            | 1.805               | 0.009              |
| OA  | 0.013            | 4.015           | 0.392            | 4.231               | 0.015              |
| LA  | 0.008            | 0.916           | 0.302            | 1.387               | 0.010              |
| LNA | 0.008            | 0.450           | 0.084            | 0.231               | 0.007              |
| AA  | 0.005            | 0.201           | 2.085            | 0.866               | 0.006              |
| DHA | 0.001            | 0.084           | 1.733            | 0.878               | 0.004              |
|     | <b>L118P4H5</b>  | <b>L119P3E5</b> | <b>L127P3G2</b>  | <b>L138P1H8N24C</b> | <b>L156P3F926C</b> |
| MA  | 0.002            | 0.133           | 0.000            | 0.030               | 0.290              |
| PA  | 0.017            | 0.423           | 0.003            | 0.141               | 2.078              |
| POA | 0.005            | 0.071           | 0.001            | 0.018               | 14.581             |
| SA  | 0.018            | 0.171           | 0.014            | 0.112               | 4.779              |
| OA  | 0.037            | 0.133           | 0.029            | 0.259               | 10.687             |
| LA  | 0.018            | 0.068           | 0.020            | 0.124               | 3.141              |
| LNA | 0.008            | 0.035           | 0.005            | 0.461               | 1.435              |
| AA  | 0.039            | 0.027           | 0.906            | 0.018               | 0.758              |
| DHA | 0.188            | 0.010           | 0.238            | 0.028               | 0.401              |

**Supplemental Table S4. Error simulations for FFAu profiling as functions of the R value CV and the total FFAu concentration.** The R value CVs range from 0% (for the “true” FFAu profile) to 5% and the total simulated FFAu concentrations were 0.5, 1.5 and 5.0 nM. The simulated profiles are in mole fractions for each of the 9 FFA of Table 1. The CV values for each FFAu were determined from the fits to 20 simulated FFAu profiles whose underlying R values were randomly altered by 1 to 2 % about the “true” profile R values (0%).

| <b>R value CV</b> | <b>Total FFAu</b> | <b>Mole Fraction FFAu</b> |           |            |           |           |           |            |           |            |
|-------------------|-------------------|---------------------------|-----------|------------|-----------|-----------|-----------|------------|-----------|------------|
|                   |                   | <b>MA</b>                 | <b>PA</b> | <b>POA</b> | <b>SA</b> | <b>OA</b> | <b>LA</b> | <b>LNA</b> | <b>AA</b> | <b>DHA</b> |
| <b>0%</b>         | <b>CV</b>         | 0.22                      | 0.135     | 0.137      | 0.022     | 0.335     | 0.038     | 0.042      | 0.059     | 0.013      |
| <b>1%</b>         | <b>0.496</b>      | 0.210                     | 0.139     | 0.139      | 0.023     | 0.335     | 0.042     | 0.037      | 0.057     | 0.019      |
|                   | 3%                | 13%                       | 19%       | 16%        | 39%       | 8%        | 41%       | 72%        | 13%       | 46%        |
|                   | <b>1.506</b>      | 0.220                     | 0.134     | 0.136      | 0.022     | 0.335     | 0.036     | 0.044      | 0.058     | 0.014      |
|                   | 1%                | 5%                        | 7%        | 6%         | 15%       | 3%        | 20%       | 23%        | 5%        | 31%        |
|                   | <b>5.012</b>      | 0.221                     | 0.132     | 0.137      | 0.023     | 0.335     | 0.038     | 0.043      | 0.059     | 0.013      |
|                   | 1%                | 3%                        | 5%        | 4%         | 12%       | 1%        | 9%        | 8%         | 2%        | 12%        |
| <b>2%</b>         | <b>0.484</b>      | 0.201                     | 0.138     | 0.186      | 0.026     | 0.279     | 0.020     | 0.084      | 0.054     | 0.012      |
|                   | 13%               | 41%                       | 66%       | 49%        | 71%       | 34%       | 109%      | 56%        | 31%       | 112%       |
|                   | <b>1.502</b>      | 0.227                     | 0.126     | 0.142      | 0.025     | 0.330     | 0.041     | 0.038      | 0.059     | 0.012      |
|                   | 3%                | 10%                       | 13%       | 10%        | 20%       | 4%        | 35%       | 49%        | 14%       | 73%        |
|                   | <b>5.008</b>      | 0.222                     | 0.134     | 0.136      | 0.021     | 0.337     | 0.035     | 0.044      | 0.058     | 0.013      |
|                   | 1%                | 4%                        | 7%        | 6%         | 24%       | 3%        | 21%       | 22%        | 4%        | 20%        |

**Supplemental Table S5: HSA – FFA equilibrium dissociation constants ( $K_d$ ).** Measurements were performed at 22°C. The standard deviations (SD) of at least two measurements are in nM. The BSA results were determined previously (10).

| FFA | No. Sites | $K_d$ (nM) | SD  | BSA Sites | BSA $K_d$ | BSA SD |
|-----|-----------|------------|-----|-----------|-----------|--------|
| MA  | 6         | 50.1       | 9.2 |           |           |        |
| PA  | 6         | 10.7       | 1.0 | 7         | 8.0       | 0.2    |
| POA | 5         | 26.8       | 0.2 | 7         | 38        | 2      |
| SA  | 5         | 4.3        | 0.5 | 6         | 4.1       | 0.2    |
| OA  | 7         | 4.7        | 0.6 | 7         | 5.9       | 0.1    |
| LA  | 6         | 15.2       | 1   | 7         | 13        | 2      |
| LNA | 7         | 48.0       | 2.8 | 7         | 35        | 1      |
| AA  | 8         | 11.7       | 1.2 | 7         | 16        | 1      |
| DHA | 7         | 22.2       | 1.3 |           |           |        |
